# Supplementary material for: Development and Psychometric Evaluation of an Instrument to Assess Cross-Cultural Competence of Healthcare Professionals (CCCHP)
Source: PubMed Central journal article supplement (PMC4671537; doi:10.1371/journal.pone.0144049), 2015-12-07
Supplement: pone.0144049.s003.pdf [file pone.0144049.s003.pdf]

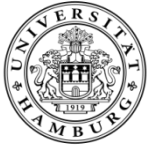

Universitätsklinikum  
Hamburg-Eppendorf

# **Cross-Cultural Competence instrument for Healthcare Professionals (CCCHP-27)**

University Medical Centre Hamburg-Eppendorf (UKE)  
Department of Medical Psychology  
Study Group on Psychosocial Migration Research  
Martinistrasse 52  
20246 Hamburg, Germany

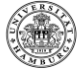

| After each statement, please only mark the box for the answer which is most applicable to you.                                                  | Completely agree                      | Mostly agree                          | Neither agree nor disagree            | Mostly disagree                       | Completely disagree                   | No answer possible                    |
|-------------------------------------------------------------------------------------------------------------------------------------------------|---------------------------------------|---------------------------------------|---------------------------------------|---------------------------------------|---------------------------------------|---------------------------------------|
| 1. I consider working in a cross-cultural team an enrichment.                                                                                   | <input type="checkbox"/> <sub>5</sub> | <input type="checkbox"/> <sub>4</sub> | <input type="checkbox"/> <sub>3</sub> | <input type="checkbox"/> <sub>2</sub> | <input type="checkbox"/> <sub>1</sub> | <input type="checkbox"/> <sub>0</sub> |
| 2. In order to achieve the agreed treatment goal, I ask patients with a migration background what they need in terms of support.                | <input type="checkbox"/> <sub>5</sub> | <input type="checkbox"/> <sub>4</sub> | <input type="checkbox"/> <sub>3</sub> | <input type="checkbox"/> <sub>2</sub> | <input type="checkbox"/> <sub>1</sub> | <input type="checkbox"/> <sub>0</sub> |
| 3. I find it an imposition, when people who migrated to [country concerned] a long time ago, cannot speak [language concerned] properly.        | <input type="checkbox"/> <sub>5</sub> | <input type="checkbox"/> <sub>4</sub> | <input type="checkbox"/> <sub>3</sub> | <input type="checkbox"/> <sub>2</sub> | <input type="checkbox"/> <sub>1</sub> | <input type="checkbox"/> <sub>0</sub> |
| 4. Within the migrant population, there are hardly any differences in terms of health opportunities and disease risks.                          | <input type="checkbox"/> <sub>5</sub> | <input type="checkbox"/> <sub>4</sub> | <input type="checkbox"/> <sub>3</sub> | <input type="checkbox"/> <sub>2</sub> | <input type="checkbox"/> <sub>1</sub> | <input type="checkbox"/> <sub>0</sub> |
| 5. By communicating with patients with a migration background I can learn about different cultural orientations.                                | <input type="checkbox"/> <sub>5</sub> | <input type="checkbox"/> <sub>4</sub> | <input type="checkbox"/> <sub>3</sub> | <input type="checkbox"/> <sub>2</sub> | <input type="checkbox"/> <sub>1</sub> | <input type="checkbox"/> <sub>0</sub> |
| 6. My professional perception, assessment, and behaviour remain untouched by my cultural imprinting.                                            | <input type="checkbox"/> <sub>5</sub> | <input type="checkbox"/> <sub>4</sub> | <input type="checkbox"/> <sub>3</sub> | <input type="checkbox"/> <sub>2</sub> | <input type="checkbox"/> <sub>1</sub> | <input type="checkbox"/> <sub>0</sub> |
| 7. Cultural diversity is also an enrichment.                                                                                                    | <input type="checkbox"/> <sub>5</sub> | <input type="checkbox"/> <sub>4</sub> | <input type="checkbox"/> <sub>3</sub> | <input type="checkbox"/> <sub>2</sub> | <input type="checkbox"/> <sub>1</sub> | <input type="checkbox"/> <sub>0</sub> |
| 8. I enjoy talking to people who have migrated to [country concerned] about their experiences here.                                             | <input type="checkbox"/> <sub>5</sub> | <input type="checkbox"/> <sub>4</sub> | <input type="checkbox"/> <sub>3</sub> | <input type="checkbox"/> <sub>2</sub> | <input type="checkbox"/> <sub>1</sub> | <input type="checkbox"/> <sub>0</sub> |
| 9. I often find it difficult to relate to the elaborations of my patients, when their socio-cultural background is quite different from my own. | <input type="checkbox"/> <sub>5</sub> | <input type="checkbox"/> <sub>4</sub> | <input type="checkbox"/> <sub>3</sub> | <input type="checkbox"/> <sub>2</sub> | <input type="checkbox"/> <sub>1</sub> | <input type="checkbox"/> <sub>0</sub> |
| 10. I do not differentiate between patients and treat all equally, even though it is sometimes difficult to communicate.                        | <input type="checkbox"/> <sub>5</sub> | <input type="checkbox"/> <sub>4</sub> | <input type="checkbox"/> <sub>3</sub> | <input type="checkbox"/> <sub>2</sub> | <input type="checkbox"/> <sub>1</sub> | <input type="checkbox"/> <sub>0</sub> |
| 11. I have the impression that migrants often assume discrimination, when in fact general rules are simply being enforced.                      | <input type="checkbox"/> <sub>5</sub> | <input type="checkbox"/> <sub>4</sub> | <input type="checkbox"/> <sub>3</sub> | <input type="checkbox"/> <sub>2</sub> | <input type="checkbox"/> <sub>1</sub> | <input type="checkbox"/> <sub>0</sub> |
| 12. The migration experience is a critical life event and can be accompanied by psychosocial stress and health burden.                          | <input type="checkbox"/> <sub>5</sub> | <input type="checkbox"/> <sub>4</sub> | <input type="checkbox"/> <sub>3</sub> | <input type="checkbox"/> <sub>2</sub> | <input type="checkbox"/> <sub>1</sub> | <input type="checkbox"/> <sub>0</sub> |



| After each statement, please only mark the box for the answer which is most applicable to you.                                                           | Completely agree                      | Mostly agree                          | Neither agree nor disagree            | Mostly disagree                       | Completely disagree                   | No answer possible                    |
|----------------------------------------------------------------------------------------------------------------------------------------------------------|---------------------------------------|---------------------------------------|---------------------------------------|---------------------------------------|---------------------------------------|---------------------------------------|
| 13. I find it difficult to speak slowly in lay language with people who struggle to understand my instructions.                                          | <input type="checkbox"/> <sub>5</sub> | <input type="checkbox"/> <sub>4</sub> | <input type="checkbox"/> <sub>3</sub> | <input type="checkbox"/> <sub>2</sub> | <input type="checkbox"/> <sub>1</sub> | <input type="checkbox"/> <sub>0</sub> |
| 14. I always remain friendly and courteous with people from a different cultural background, even when I am stressed out.                                | <input type="checkbox"/> <sub>5</sub> | <input type="checkbox"/> <sub>4</sub> | <input type="checkbox"/> <sub>3</sub> | <input type="checkbox"/> <sub>2</sub> | <input type="checkbox"/> <sub>1</sub> | <input type="checkbox"/> <sub>0</sub> |
| 15. The interaction with people from other cultural backgrounds helps me reflect upon my own cultural background.                                        | <input type="checkbox"/> <sub>5</sub> | <input type="checkbox"/> <sub>4</sub> | <input type="checkbox"/> <sub>3</sub> | <input type="checkbox"/> <sub>2</sub> | <input type="checkbox"/> <sub>1</sub> | <input type="checkbox"/> <sub>0</sub> |
| 16. The disease concepts of patients with a migration background are not relevant for treatment success.                                                 | <input type="checkbox"/> <sub>5</sub> | <input type="checkbox"/> <sub>4</sub> | <input type="checkbox"/> <sub>3</sub> | <input type="checkbox"/> <sub>2</sub> | <input type="checkbox"/> <sub>1</sub> | <input type="checkbox"/> <sub>0</sub> |
| 17. In a conversation I always listen attentively and let individuals with a migration background finish their sentences.                                | <input type="checkbox"/> <sub>5</sub> | <input type="checkbox"/> <sub>4</sub> | <input type="checkbox"/> <sub>3</sub> | <input type="checkbox"/> <sub>2</sub> | <input type="checkbox"/> <sub>1</sub> | <input type="checkbox"/> <sub>0</sub> |
| 18. During arguments with people from a different cultural background, I always remain factual and objective.                                            | <input type="checkbox"/> <sub>5</sub> | <input type="checkbox"/> <sub>4</sub> | <input type="checkbox"/> <sub>3</sub> | <input type="checkbox"/> <sub>2</sub> | <input type="checkbox"/> <sub>1</sub> | <input type="checkbox"/> <sub>0</sub> |
| 19. I would like to make use of training, advising and educational offers, in order to improve my understanding of patients with a migration background. | <input type="checkbox"/> <sub>5</sub> | <input type="checkbox"/> <sub>4</sub> | <input type="checkbox"/> <sub>3</sub> | <input type="checkbox"/> <sub>2</sub> | <input type="checkbox"/> <sub>1</sub> | <input type="checkbox"/> <sub>0</sub> |
| 20. I consider it an enrichment to have friendships with people from different cultural backgrounds.                                                     | <input type="checkbox"/> <sub>5</sub> | <input type="checkbox"/> <sub>4</sub> | <input type="checkbox"/> <sub>3</sub> | <input type="checkbox"/> <sub>2</sub> | <input type="checkbox"/> <sub>1</sub> | <input type="checkbox"/> <sub>0</sub> |
| 21. People who migrate to [country concerned] should adapt to society, not the other way around.                                                         | <input type="checkbox"/> <sub>5</sub> | <input type="checkbox"/> <sub>4</sub> | <input type="checkbox"/> <sub>3</sub> | <input type="checkbox"/> <sub>2</sub> | <input type="checkbox"/> <sub>1</sub> | <input type="checkbox"/> <sub>0</sub> |
| 22. With patients who do not understand [language concerned] very well, I take more time to explain the treatment options to them.                       | <input type="checkbox"/> <sub>5</sub> | <input type="checkbox"/> <sub>4</sub> | <input type="checkbox"/> <sub>3</sub> | <input type="checkbox"/> <sub>2</sub> | <input type="checkbox"/> <sub>1</sub> | <input type="checkbox"/> <sub>0</sub> |
| 23. I prefer treating patients from my own cultural background, than those who seem foreign to me.                                                       | <input type="checkbox"/> <sub>5</sub> | <input type="checkbox"/> <sub>4</sub> | <input type="checkbox"/> <sub>3</sub> | <input type="checkbox"/> <sub>2</sub> | <input type="checkbox"/> <sub>1</sub> | <input type="checkbox"/> <sub>0</sub> |
| 24. With patients who do not understand [language concerned] very well, I take more time to discuss their expectations and fears.                        | <input type="checkbox"/> <sub>5</sub> | <input type="checkbox"/> <sub>4</sub> | <input type="checkbox"/> <sub>3</sub> | <input type="checkbox"/> <sub>2</sub> | <input type="checkbox"/> <sub>1</sub> | <input type="checkbox"/> <sub>0</sub> |



| After each statement, please only mark the box for the answer which is most applicable to you.                                                                                                                                       | Completely agree                      | Mostly agree                          | Neither agree nor disagree            | Mostly disagree                       | Completely disagree                   | No answer possible                    |
|--------------------------------------------------------------------------------------------------------------------------------------------------------------------------------------------------------------------------------------|---------------------------------------|---------------------------------------|---------------------------------------|---------------------------------------|---------------------------------------|---------------------------------------|
| 25. Culturally specific factors of people (e.g. values, behaviour norms, beliefs) influence their understanding of disease significantly, and should therefore be assessed and taken into consideration by healthcare professionals. | <input type="checkbox"/> <sub>5</sub> | <input type="checkbox"/> <sub>4</sub> | <input type="checkbox"/> <sub>3</sub> | <input type="checkbox"/> <sub>2</sub> | <input type="checkbox"/> <sub>1</sub> | <input type="checkbox"/> <sub>0</sub> |
| 26. I consider the values of patients in relation to family, religion, etc., if they seem relevant for the treatment.                                                                                                                | <input type="checkbox"/> <sub>5</sub> | <input type="checkbox"/> <sub>4</sub> | <input type="checkbox"/> <sub>3</sub> | <input type="checkbox"/> <sub>2</sub> | <input type="checkbox"/> <sub>1</sub> | <input type="checkbox"/> <sub>0</sub> |
| 27. In my professional interaction with patients with a migration background, I often feel unsure, angry and frustrated.                                                                                                             | <input type="checkbox"/> <sub>5</sub> | <input type="checkbox"/> <sub>4</sub> | <input type="checkbox"/> <sub>3</sub> | <input type="checkbox"/> <sub>2</sub> | <input type="checkbox"/> <sub>1</sub> | <input type="checkbox"/> <sub>0</sub> |
| 28. It is important for me to treat patients according to their cultural needs and individual values.                                                                                                                                | <input type="checkbox"/> <sub>5</sub> | <input type="checkbox"/> <sub>4</sub> | <input type="checkbox"/> <sub>3</sub> | <input type="checkbox"/> <sub>2</sub> | <input type="checkbox"/> <sub>1</sub> | <input type="checkbox"/> <sub>0</sub> |
| 29. Institutions and the public pay too much attention to the special wishes of migrants.                                                                                                                                            | <input type="checkbox"/> <sub>5</sub> | <input type="checkbox"/> <sub>4</sub> | <input type="checkbox"/> <sub>3</sub> | <input type="checkbox"/> <sub>2</sub> | <input type="checkbox"/> <sub>1</sub> | <input type="checkbox"/> <sub>0</sub> |
| 30. I never hesitate to help someone with a different cultural background in case of emergency.                                                                                                                                      | <input type="checkbox"/> <sub>5</sub> | <input type="checkbox"/> <sub>4</sub> | <input type="checkbox"/> <sub>3</sub> | <input type="checkbox"/> <sub>2</sub> | <input type="checkbox"/> <sub>1</sub> | <input type="checkbox"/> <sub>0</sub> |
| 31. I get impatient when I cannot make myself understood with patients with a migration background.                                                                                                                                  | <input type="checkbox"/> <sub>5</sub> | <input type="checkbox"/> <sub>4</sub> | <input type="checkbox"/> <sub>3</sub> | <input type="checkbox"/> <sub>2</sub> | <input type="checkbox"/> <sub>1</sub> | <input type="checkbox"/> <sub>0</sub> |
| 32. I find it exciting to treat patients with a migration background.                                                                                                                                                                | <input type="checkbox"/> <sub>5</sub> | <input type="checkbox"/> <sub>4</sub> | <input type="checkbox"/> <sub>3</sub> | <input type="checkbox"/> <sub>2</sub> | <input type="checkbox"/> <sub>1</sub> | <input type="checkbox"/> <sub>0</sub> |

Remark: the term “people with a migration background” can be replaced with “people who have migrated to [country concerned]”.

## Scales of the „Cross-Cultural Competence instrument for Healthcare Professionals“ (CCCHP-27)

The CCCHP-27 includes five scales measuring cross-cultural competence. The scale values are determined as the means of the corresponding raw item scores.

| Scales of Cross-Cultural Competence | Item No.                       |
|-------------------------------------|--------------------------------|
| Motivation/Curiosity<br>(9 Items)   | 20, 7, 32, 1, 8, 15, 5, 19, 28 |
| Attitudes<br>(4 Items)              | 3*, 21*, 29*, 11*              |
| Skills<br>(5 Items)                 | 24, 2, 22, 25, 26,             |
| Emotions/Empathy<br>(5 Items)       | 27*, 9*, 31*, 13*, 23*         |
| Knowledge/Awareness<br>(4 Items)    | 16*, 4*, 6*, 12                |

\* Items marked with an asterisk must be recoded before calculating the scale scores (5=1, 4=2, 3=3, 2=4, 1=5).

In addition, the CCCHP-27 also comprises five items for detecting the impact of social desirability on the responses.

|                                  |                    |
|----------------------------------|--------------------|
| Social desirability<br>(5 Items) | 30, 18, 14, 10, 17 |
|----------------------------------|--------------------|
